# Supplementary material
Source: PubMed Central journal article supplement (PMC6497952)
Supplement: supp_RA118.007204_142651_2_supp_296131_pny6pn.pdf [file supp_RA118.007204_142651_2_supp_296131_pny6pn.pdf]

## SUPPORTING INFORMATION

### **Design and characterization of mutant and wild-type huntingtin proteins produced from a toolkit of scalable eukaryotic expression systems**

Rachel J. Harding<sup>1\*</sup>, Peter Loppnau<sup>1</sup>, Suzanne Ackloo<sup>1</sup>, Alexander Lemak<sup>2</sup>, Ashley Hutchinson<sup>1</sup>, Brittany Hunt<sup>1†</sup>, Alex S. Holehouse<sup>3</sup>, Jolene C. Ho<sup>1</sup>, Lixin Fan<sup>4</sup>, Leticia Toledo-Sherman<sup>5‡</sup>, Alma Seitova<sup>1</sup>, Cheryl H. Arrowsmith<sup>1,2\*</sup>

<sup>1</sup> Structural Genomics Consortium, University of Toronto, MaRS South Tower, 101 College Street, Toronto, Ontario M5G 1L7, Canada.

<sup>2</sup> Princess Margaret Cancer Centre and Department of Medical Biophysics, University of Toronto, Toronto, Ontario M5G 1L7, Canada

<sup>3</sup> Department of Biomedical Engineering and Center for Biological Systems Engineering, Washington University in Saint Louis, Saint Louis, Missouri 63130, USA

<sup>4</sup> Basic Science Program, Frederick National Laboratory for Cancer Research, SAXS Core of National Cancer Institute, Frederick, MD 21701, USA

<sup>5</sup> CHDI Foundation, 6080 Center Drive, Suite 700, Los Angeles, CA 90045, USA

**Running title:** A toolkit of HTT protein resources

† Present address: Custom Biologics, 115 Skyway Ave, Toronto, Ontario M9W 4Z4, Canada

‡ Present address: The Tau Consortium, The Rainwater Charitable Foundation, 777 Main St, Ste 2250, Fort Worth, Texas 76102, USA

\*To whom correspondence should be addressed:

Rachel J. Harding,

Tel.: +1 (416) 946-3795

Email: [Rachel.Harding@utoronto.ca](mailto:Rachel.Harding@utoronto.ca)

Cheryl H. Arrowsmith

Tel.: +1 (416) 946-0881

E-mail: [Cheryl.Arrowsmith@uhnresearch.ca](mailto:Cheryl.Arrowsmith@uhnresearch.ca)

#### **Table of contents:**

p S-2 - Table S1. Database search results for HTT<sup>1-3144</sup> Q23 expressed in EXPI293F cells.

p S-3 - Figure S1. Western blot analysis of HTT samples from different expression systems.

p S-4 - Figure S2. Mass spectrometry sequence coverage maps of Sf9 HTT<sup>1-3144</sup> Q23

p S-5 - Figure S3. Mass spectrometry sequence coverage maps of EXPI293F HTT<sup>1-3144</sup> Q23

p S-6 - Figure S4. Exemplary spectra of peptides identified after digesting HTT<sup>1-3144</sup> Q23 from Sf9 with pepsin.

p S-8 - Figure S5. Exemplary spectra for peptides identified after digesting HTT<sup>1-3144</sup> Q23 from Sf9 with trypsin or lysargiNase.

p S-13 - Figure S6. Exemplary spectra of peptides identified after digesting HTT<sup>1-3144</sup> Q23 from EXPI293F with trypsin.

p S-19 - Figure S7. Mapping HTT posttranslational modifications identified from HTT<sup>1-3144</sup> samples from Sf9 and EXPI293F cells onto the HTT structure.

p S-20 – References

**Table S1. Database search results for HTT<sup>1-3144</sup> Q23 expressed in EXPI293F cells.** Proteins with five or more total no. spectra are listed. Of the peptides which do not correspond to HTT protein, most either have very high scores in the CRAPome (1), suggesting that these are non-specific contaminants of the co-immunoprecipitation step, not true HTT interactors, or they are very low abundance.

| Protein Accession | Total no. spectra | No. unique peptides | Protein Accession | Total no. spectra | No. unique peptides | Protein Accession | Total no. spectra | No. unique peptides |
|-------------------|-------------------|---------------------|-------------------|-------------------|---------------------|-------------------|-------------------|---------------------|
| P42858 HD         | 7681              | 1150                | P0C0S5 H2AZ       | 14                | 4                   | O60391 NMD3B      | 8                 | 2                   |
| Q13748 TBA3C      | 175               | 29                  | P0C0S8 H2A1       | 14                | 4                   | O75534 CSDE1      | 8                 | 2                   |
| Q13885 TBB2A      | 111               | 26                  | P16104 H2AX       | 14                | 4                   | P49137 MAPK2      | 8                 | 2                   |
| Q9BVA1 TBB2B      | 111               | 26                  | P20671 H2A1D      | 14                | 4                   | P62269 RS18       | 8                 | 2                   |
| P07900 HS90A      | 110               | 24                  | P34931 HS71L      | 14                | 5                   | Q16695 H31T       | 8                 | 2                   |
| Q6PEY2 TBA3E      | 64                | 13                  | Q16777 H2A2C      | 14                | 4                   | Q8NCG5 CHST4      | 8                 | 2                   |
| Q9BYE2 TMPSD      | 56                | 7                   | Q6F113 H2A2A      | 14                | 4                   | Q8WUA7 TB22A      | 8                 | 2                   |
| Q9NY65 TBA8       | 54                | 9                   | Q71UI9 H2AV       | 14                | 4                   | Q9NRC6 SPTN5      | 8                 | 2                   |
| Q71U36 TBA1A      | 51                | 12                  | Q7L7L0 H2A3       | 14                | 4                   | Q9NRD9 DUOX1      | 8                 | 2                   |
| P04350 TBB4A      | 48                | 12                  | Q93077 H2A1C      | 14                | 4                   | O15381 NVL        | 7                 | 2                   |
| P60709 ACTB       | 45                | 13                  | Q96KK5 H2A1H      | 14                | 4                   | Q15021 CND1       | 7                 | 2                   |
| P11142 HSP7C      | 44                | 12                  | Q96QV6 H2A1A      | 14                | 4                   | Q5T9S5 CCD18      | 7                 | 2                   |
| P63261 ACTG       | 44                | 13                  | Q99878 H2A1J      | 14                | 4                   | Q5VZP5 DUS27      | 7                 | 2                   |
| P23396 RS3        | 43                | 11                  | Q9BTM1 H2AJ       | 14                | 4                   | Q6WR10 IGS10      | 7                 | 2                   |
| P54652 HSP72      | 43                | 12                  | Q9H2M9 RBGPR      | 14                | 2                   | Q709C8 VP13C      | 7                 | 2                   |
| P15880 RS2        | 38                | 11                  | Q9NY93 DDX56      | 14                | 3                   | Q96JC1 VPS39      | 7                 | 2                   |
| Q13509 TBB3       | 36                | 8                   | Q9P225 DYH2       | 14                | 4                   | Q9BSJ2 GCP2       | 7                 | 2                   |
| tr A0A0B4J269     | 32                | 7                   | Q9UKN7 MYO15      | 14                | 3                   | Q9P1Y6 PHRF1      | 7                 | 2                   |
| P0DMV8 HS71A      | 31                | 9                   | Q58FF7 H90B3      | 13                | 5                   | Q9P1Z3 HCN3       | 7                 | 2                   |
| P0DMV9 HS71B      | 31                | 9                   | Q8IVL1 NAV2       | 13                | 3                   | Q9P2E5 CHPF2      | 7                 | 2                   |
| P07437 TBB5       | 30                | 7                   | Q9H853 TBA4B      | 13                | 3                   | Q9UL51 HCN2       | 7                 | 2                   |
| Q9BWH6 RPAP1      | 27                | 4                   | P02549 SPTA1      | 12                | 2                   | Q9Y3Q4 HCN4       | 7                 | 2                   |
| Q5VYK3 ECM29      | 26                | 6                   | P62805 H4         | 12                | 2                   | A6NE52 WDR97      | 6                 | 1                   |
| Q8WXG9 GPR98      | 26                | 4                   | Q14568 HS902      | 12                | 5                   | O43314 VIP2       | 6                 | 1                   |
| Q562R1 ACTBL      | 24                | 7                   | Q5CZC0 FSIP2      | 12                | 5                   | O43896 KIF1C      | 6                 | 2                   |
| Q9UPN3 MACF1      | 23                | 4                   | Q5S007 LRRK2      | 12                | 2                   | P05164 PERM       | 6                 | 2                   |
| A6NKT7 RGPD3      | 22                | 6                   | Q7Z5J8 ANKAR      | 12                | 3                   | P08670 VIME       | 6                 | 1                   |
| P17066 HSP76      | 21                | 7                   | Q8TE73 DYH5       | 12                | 6                   | P19823 ITIH2      | 6                 | 2                   |
| Q03001 DYST       | 21                | 3                   | Q96JB1 DYH8       | 12                | 4                   | Q13608 PEX6       | 6                 | 1                   |
| P08238 HS90B      | 20                | 7                   | Q96PX9 PKH4B      | 12                | 2                   | Q13683 ITA7       | 6                 | 1                   |
| Q9BQG0 MBB1A      | 20                | 5                   | Q9UDT6 CLIP2      | 12                | 3                   | Q2LD37 K1109      | 6                 | 1                   |
| P11021 GRP78      | 19                | 6                   | O60890 OPHN1      | 11                | 3                   | Q5JV73 FRPD3      | 6                 | 3                   |
| Q58FG1 HS904      | 19                | 4                   | Q02224 CENPE      | 11                | 3                   | Q5JWR5 DOP1       | 6                 | 1                   |
| Q8NET8 TRPV3      | 19                | 3                   | Q6ZQQ6 WDR87      | 11                | 2                   | Q6N069 NAA16      | 6                 | 2                   |
| O60814 H2B1K      | 18                | 3                   | Q7Z333 SETX       | 11                | 4                   | Q86XA9 HTR5A      | 6                 | 1                   |
| P06899 H2B1J      | 18                | 3                   | Q86UQ4 ABCAD      | 11                | 4                   | Q8NCM8 DYHC2      | 6                 | 1                   |
| P23527 H2B1O      | 18                | 3                   | Q9Y4F4 TGRM1      | 11                | 3                   | Q8TD57 DYH3       | 6                 | 2                   |
| P33778 H2B1B      | 18                | 3                   | P21817 RYSR1      | 10                | 2                   | Q92997 DVL3       | 6                 | 1                   |
| P57053 H2BFS      | 18                | 3                   | Q12955 ANK3       | 10                | 5                   | Q96A08 H2B1A      | 6                 | 1                   |
| P58876 H2B1D      | 18                | 3                   | Q1XH10 SKDA1      | 10                | 2                   | Q96QT4 TRPM7      | 6                 | 1                   |
| P62807 H2B1C      | 18                | 3                   | Q5T1B0 AXDN1      | 10                | 2                   | Q99996 AKAP9      | 6                 | 3                   |
| Q16778 H2B2E      | 18                | 3                   | Q86U86 PB1        | 10                | 3                   | Q9HCK8 CHD8       | 6                 | 3                   |
| Q5QNW6 H2B2F      | 18                | 3                   | Q86VI3 IQGA3      | 10                | 3                   | Q9NYC9 DYH9       | 6                 | 1                   |
| Q8N257 H2B3B      | 18                | 3                   | Q8IZD9 DOCK3      | 10                | 3                   | Q9P2D1 CHD7       | 6                 | 3                   |
| Q93079 H2B1H      | 18                | 3                   | Q13136 LIPA1      | 9                 | 4                   | P09131 P3         | 5                 | 1                   |
| Q99877 H2B1N      | 18                | 3                   | Q15751 HERC1      | 9                 | 3                   | Q13576 IQGA2      | 5                 | 2                   |
| Q99879 H2B1M      | 18                | 3                   | Q6PI48 SYDM       | 9                 | 3                   | Q15746 MYLK       | 5                 | 1                   |
| Q99880 H2B1L      | 18                | 3                   | Q9HBJ7 UBP29      | 9                 | 3                   | Q86VV8 RTTN       | 5                 | 3                   |
| Q12931 TRAP1      | 16                | 5                   | Q9P0L2 MARK1      | 9                 | 1                   | Q8NBX0 SCPDL      | 5                 | 2                   |
| Q8IVF2 AHNK2      | 16                | 1                   | Q9P217 ZSWM5      | 9                 | 3                   | Q8TD26 CHD6       | 5                 | 2                   |
| O14647 CHD2       | 15                | 2                   | tr Q5TEC6 Q5TEC6  | 9                 | 3                   | Q9ULT8 HECD1      | 5                 | 3                   |
| P04908 H2A1B      | 14                | 4                   | O15078 CE290      | 8                 | 3                   |                   |                   |                     |

A toolkit of HTT protein resources

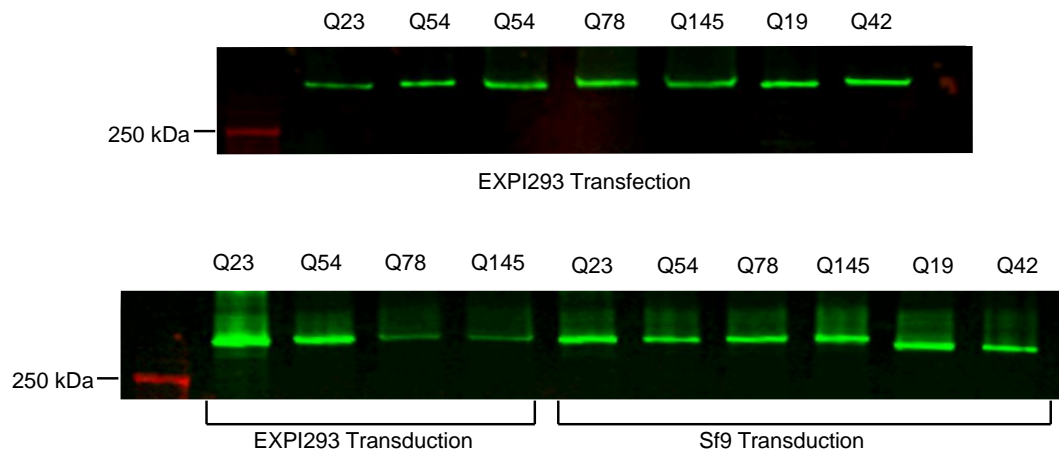

**Figure S1. Western blot analysis of HTT samples from different expression systems.** C-terminally FLAG-tagged HTT derived from EXPI293F expression, either by transient transfection or baculoviral transduction in EXPI293F cells or baculoviral transduction in Sf9 cells, were subject to Western Blot analysis with ab109115 which binds an epitope at amino acids 1-100.

A toolkit of HTT protein resources

A)

```

1  MATLEKLMKA FESLKSFQQQ QQQQQQQQQQ QQQQQQQQPP PPPPPPPPPQ LPQPPPPQAP LLPQPQPPPP PPPPPPPGPAV AEEPLHRPKK ELSATKKDRV
101 NHCLTICENI VAQSVRNPE FQKLLGIAME LFLLCSDDAE SDVRMVADEC LNKVIKALMD SNLPRQLQEL YKEIKKNGAP RSLRAALWRF AEAHLVLRPQ
201 KCRPYLVNLI PCLTRTSKRP EESVQETLAA AVPKIMASFG NFANDNEIKV LKAFIANLK SSSPTIRRTA AGSAVSIQCH SRRTOYFYSW LNVLLGLLV
301 FVEDEHSTLL ILGVLTLIRY LVPLLQQQVK DTSLKGSFGV TRKEMEVSFS AEQLVQVYEL TLHHTQHQDH NVVTGALELL QQLFRTPPPE LLQTLTAVGG
401 IGQLTAAKEE SGGRSRSGSI VELIAGGSSS CSPVLSRKQK GKVLGGEAEA LEDDSESRSD VSSSALTASV KDEISGELAA SSGVSTPGSA GHDIITEQPR
501 SQHTLQADSV DLASCDLTSR ATDGDEEDIL SHSSQVSAV PSDPAMDLDND GTQASSPISD SSQTTTEGPD SAVTPSDSSE IVDLGDNDQY LGLQIGQPQD
601 EDEEATGILP DEASEAFRNS SMALQQAHLL KNMSHCRQPS DSSVDKFLVR DEATEPGDQE NKPCRIRKGI QGSTDSDSAP LVHCVRLLSA SFLLTGGKNV
701 LVFDRDRVRS VKALALSCVG AVALHPESF FSKLYKVLPL TTEYPEEQYV SDILNYIDHG DPQVRGATAI LCGTLICISIL SRSRPHVGDW MGTIRTLTGN
801 TFSLADCIPL LRKTLKDESS VTCKLACTAV RNCVMSLCSS SYSELGLQLI IDVLTIRNSS YWLVRTELE TLAEIDFRIV SFLEAKAENL HRGAHHYTG
901 LKIQFRVLNN VVIHLGDDE PRVRHVAAS LIRLVPKLFY KCDQGGADPV VAVARDQSSV YLKLHMHTQ PPSHFSVSTI TRIYRGYNLL PSITDVTMEN
1001 NLSRVIAAVS HELITSTTRA LTFGCCEALC LLSTAFFVCI WSLGWHCGVP PLSASDESRE SCTVGMATMI LTLSSAWFP LDLSAHQDAL LLAGNLLAAS
1101 APKSLRSSWA EEEANPAAT QKEEVPALG DRALVPMVEQ LFSHLLKVIN ICAHVLDVA PGPAKKAALP SLTNPPSLSP IRRKGEKEP GEQASVPLSP
1201 KKGSEASAA SQRSDTSGPVT TSKSSSLGSF YHLPKLYKLV DVLKATHANY KVTLDLQNST EKFGFLRSA LDVLSQILEL ATLQDIGKCV EELLYLKS
1301 FSREPMATV CVQQLLTKLF GTNLASQFDG LSSNPKSQG RAQLGSSSV RPLGYHYCFM APYTHFTQAL ADASLRNMVQ AEQENDTSGW FDLVQKVSQ
1401 LKTNLTSVTK NRADKNAIHN HIRLFEPLVI KALKQYTTT CVQLQKQVLD LLAQLVQLRV NYCLLSDSQV FIGFVLKQFE YIEVGQFRES EAIIPNIFFF
1501 LVLLSYERYH SKQITGIPKI IQLCDGIMAS GRKAVTHAIP ALQPIVHDLF VLRGTNKADA GKELETQKEV VVSMLLRLIQ YHQVLEMFIL VLQCKHENE
1601 DKWRLSRQI ADIILPMLAK QMHIDSHEA LGLVNLTFEI LAPSSLRPVD MLLSRMFVTP NTMASVSTVQ LWISGILAIL RVLISQSTED IVLRSIQELS
1701 FSPYLISCTV INLRDGDST STLEESEGG QIKNLPEETF SRFLQLQVGI LLEDIVTKQL KVMSEQQHT FYCQELGTL MCLIHIFKSG MFRRTATAAT
1801 RLPKSDCGCG SFYTLDSLNL RARSMTTHP ALVLLWCQIL LNVNHTDYRW WAEVQQTPKR HSLSTKLLS PQMSGEEEDS DLAAKLGMCN REIVRRGALI
1901 LFCDYVCQNL HDSEHLTWLI VNIHQDLISL SHEPPVQDFI SAVHRNSAAS GLFIQAIQSR CENLSTPTML KKTLCQLEGI HLSQSGAVIT LYVDRLLCTE
2001 FRVLARMVDI LACRVMELL AANLQSSMAQ LPMEEENRIQ EYLQSSGLAQ RHORLYSLLD RFLRSTMQDS LSPSPVSSH PLDGDGHVSL ETVSPDKDWY
2101 VHLVKSQCWT RSDSALLEGA ELVNRIPAED MNAFMNNEF NLSLLAPCLS LGMSEISGGQ KSALFEAARE VTLARVSGTV QQLPAVHVVF QPELPAEPAA
2201 YWSKINDLFG DAALYQSLEPT LARALAQYLV VVSKLPSHLH LPPEKEKDIV KFVATLEAL SWHLIHEQIP LSLDLQAGLD CCCLALQLPG LWSVSSSTEF
2301 VTHACSLIYC VHFILEAVAV PQEGQLLSP RRTNTPKAI S EEEEDVPNT QNKYITAAE EMVAEMVESL QSVLALGHKR NSGVPAFLTP LLRNIIISLA
2401 RLPLVNSYTR VPPLVWKLW SPKPGGDFGT APPEIPVEFL QEKEVKEFI YRINTLGWTS RTQFEETWAT LLGLVLTQPL VMEQESPE EDTERTQINV
2501 LAVQAITSLV LSAMTVPVAG NPAVSCLEQQ PRNKPKALD TRFGRKLSII RGIVEQEIQA MVSKRENIAT HHLYQAWDPV PLSPATGTA LISHEKLLQ
2601 INPERELGSM SYKLGQVSIH SVWLGNSITP LREEEWEDEE EEEADAPAPS SPPTSFPVNSR KHRAGVDIHS CSQFLELAYS RWILPSSAR RTPAILISEV
2701 VRSLLVSDI FTERNQFELM VYTLTELRRV HPSDEILAQ YLVPATCKAA AVLGMDKAVA EPVSRLEST LRSSHLPSPV GALHGVLYVL ECDLDDTAK
2801 QLIPVISDYL LSNLKGIAHC VNIHQSHVL VMCATAYLI ENYPLDVGPE FSASITQMGV VMLSGSEEST PSIIYHCALR GLERLLSEQ LSRDAESIV
2901 KLSVDRNVH SPHRAMAALG IMLTCTMYGK EKVSQGRVSD PNPAAPDSES VIVAMERVSV LFDRIKGFPP CEARVVARIL PQPLDDFFPP QDIMNKVIGE
3001 FLSNQQYPQ FMATVYKVF QTLHSTGQSS MVRDWMLSL SNFTQAPVA MATWSLSCFF VSASTSPWA AILPHVISRM GKLEQVDVNL FCLVATDFYR
3101 HQIEEELDRR AFQSVLEVA APGSPYHRLT TCLRNVHKVT TC

```

B)

```

1  MATLEKLMKA FESLKSFQQQ QQQQQQQQQQ QQQQQQQQPP PPPPPPPPPQ LPQPPPPQAP LLPQPQPPPP PPPPPPPGPAV AEEPLHRPKK ELSATKKDRV
101 NHCLTICENI VAQSVRNPE FQKLLGIAME LFLLCSDDAE SDVRMVADEC LNKVIKALMD SNLPRQLQEL YKEIKKNGAP RSLRAALWRF AEAHLVLRPQ
201 KCRPYLVNLI PCLTRTSKRP EESVQETLAA AVPKIMASFG NFANDNEIKV LKAFIANLK SSSPTIRRTA AGSAVSIQCH SRRTOYFYSW LNVLLGLLV
301 FVEDEHSTLL ILGVLTLIRY LVPLLQQQVK DTSLKGSFGV TRKEMEVSFS AEQLVQVYEL TLHHTQHQDH NVVTGALELL QQLFRTPPPE LLQTLTAVGG
401 IGQLTAAKEE SGGRSRSGSI VELIAGGSSS CSPVLSRKQK GKVLGGEAEA LEDDSESRSD VSSSALTASV KDEISGELAA SSGVSTPGSA GHDIITEQPR
501 SQHTLQADSV DLASCDLTSR ATDGDEEDIL SHSSQVSAV PSDPAMDLDND GTQASSPISD SSQTTTEGPD SAVTPSDSSE IVDLGDNDQY LGLQIGQPQD
601 EDEEATGILP DEASEAFRNS SMALQQAHLL KNMSHCRQPS DSSVDKFLVR DEATEPGDQE NKPCRIRKGI QGSTDSDSAP LVHCVRLLSA SFLLTGGKNV
701 LVFDRDRVRS VKALALSCVG AVALHPESF FSKLYKVLPL TTEYPEEQYV SDILNYIDHG DPQVRGATAI LCGTLICISIL SRSRPHVGDW MGTIRTLTGN
801 TFSLADCIPL LRKTLKDESS VTCKLACTAV RNCVMSLCSS SYSELGLQLI IDVLTIRNSS YWLVRTELE TLAEIDFRIV SFLEAKAENL HRGAHHYTG
901 LKIQFRVLNN VVIHLGDDE PRVRHVAAS LIRLVPKLFY KCDQGGADPV VAVARDQSSV YLKLHMHTQ PPSHFSVSTI TRIYRGYNLL PSITDVTMEN
1001 NLSRVIAAVS HELITSTTRA LTFGCCEALC LLSTAFFVCI WSLGWHCGVP PLSASDESRE SCTVGMATMI LTLSSAWFP LDLSAHQDAL LLAGNLLAAS
1101 APKSLRSSWA EEEANPAAT QKEEVPALG DRALVPMVEQ LFSHLLKVIN ICAHVLDVA PGPAKKAALP SLTNPPSLSP IRRKGEKEP GEQASVPLSP
1201 KKGSEASAA SQRSDTSGPVT TSKSSSLGSF YHLPKLYKLV DVLKATHANY KVTLDLQNST EKFGFLRSA LDVLSQILEL ATLQDIGKCV EELLYLKS
1301 FSREPMATV CVQQLLTKLF GTNLASQFDG LSSNPKSQG RAQLGSSSV RPLGYHYCFM APYTHFTQAL ADASLRNMVQ AEQENDTSGW FDLVQKVSQ
1401 LKTNLTSVTK NRADKNAIHN HIRLFEPLVI KALKQYTTT CVQLQKQVLD LLAQLVQLRV NYCLLSDSQV FIGFVLKQFE YIEVGQFRES EAIIPNIFFF
1501 LVLLSYERYH SKQITGIPKI IQLCDGIMAS GRKAVTHAIP ALQPIVHDLF VLRGTNKADA GKELETQKEV VVSMLLRLIQ YHQVLEMFIL VLQCKHENE
1601 DKWRLSRQI ADIILPMLAK QMHIDSHEA LGLVNLTFEI LAPSSLRPVD MLLSRMFVTP NTMASVSTVQ LWISGILAIL RVLISQSTED IVLRSIQELS
1701 FSPYLISCTV INLRDGDST STLEESEGG QIKNLPEETF SRFLQLQVGI LLEDIVTKQL KVMSEQQHT FYCQELGTL MCLIHIFKSG MFRRTATAAT
1801 RLPKSDCGCG SFYTLDSLNL RARSMTTHP ALVLLWCQIL LNVNHTDYRW WAEVQQTPKR HSLSTKLLS PQMSGEEEDS DLAAKLGMCN REIVRRGALI
1901 LFCDYVCQNL HDSEHLTWLI VNIHQDLISL SHEPPVQDFI SAVHRNSAAS GLFIQAIQSR CENLSTPTML KKTLCQLEGI HLSQSGAVIT LYVDRLLCTE
2001 FRVLARMVDI LACRVMELL AANLQSSMAQ LPMEEENRIQ EYLQSSGLAQ RHORLYSLLD RFLRSTMQDS LSPSPVSSH PLDGDGHVSL ETVSPDKDWY
2101 VHLVKSQCWT RSDSALLEGA ELVNRIPAED MNAFMNNEF NLSLLAPCLS LGMSEISGGQ KSALFEAARE VTLARVSGTV QQLPAVHVVF QPELPAEPAA
2201 YWSKINDLFG DAALYQSLEPT LARALAQYLV VVSKLPSHLH LPPEKEKDIV KFVATLEAL SWHLIHEQIP LSLDLQAGLD CCCLALQLPG LWSVSSSTEF
2301 VTHACSLIYC VHFILEAVAV PQEGQLLSP RRTNTPKAI S EEEEDVPNT QNKYITAAE EMVAEMVESL QSVLALGHKR NSGVPAFLTP LLRNIIISLA
2401 RLPLVNSYTR VPPLVWKLW SPKPGGDFGT APPEIPVEFL QEKEVKEFI YRINTLGWTS RTQFEETWAT LLGLVLTQPL VMEQESPE EDTERTQINV
2501 LAVQAITSLV LSAMTVPVAG NPAVSCLEQQ PRNKPKALD TRFGRKLSII RGIVEQEIQA MVSKRENIAT HHLYQAWDPV PLSPATGTA LISHEKLLQ
2601 INPERELGSM SYKLGQVSIH SVWLGNSITP LREEEWEDEE EEEADAPAPS SPPTSFPVNSR KHRAGVDIHS CSQFLELAYS RWILPSSAR RTPAILISEV
2701 VRSLLVSDI FTERNQFELM VYTLTELRRV HPSDEILAQ YLVPATCKAA AVLGMDKAVA EPVSRLEST LRSSHLPSPV GALHGVLYVL ECDLDDTAK
2801 QLIPVISDYL LSNLKGIAHC VNIHQSHVL VMCATAYLI ENYPLDVGPE FSASITQMGV VMLSGSEEST PSIIYHCALR GLERLLSEQ LSRDAESIV
2901 KLSVDRNVH SPHRAMAALG IMLTCTMYGK EKVSQGRVSD PNPAAPDSES VIVAMERVSV LFDRIKGFPP CEARVVARIL PQPLDDFFPP QDIMNKVIGE
3001 FLSNQQYPQ FMATVYKVF QTLHSTGQSS MVRDWMLSL SNFTQAPVA MATWSLSCFF VSASTSPWA AILPHVISRM GKLEQVDVNL FCLVATDFYR
3101 HQIEEELDRR AFQSVLEVA APGSPYHRLT TCLRNVHKVT TC

```

**Figure S2. Primary sequence coverage maps of Sf9 HTT<sup>1-3144</sup> Q23.** A) 97% coverage obtained by combining the database search results obtained from 5 enzymes (pepsin, WaLP, MaLP, lysargiNase, and trypsin), and B) 66% coverage obtained from 2 enzymes (lysargiNase and trypsin). NB: table displays HTT Q21 sequence as UniProt database used in sequence search.



A toolkit of HTT protein resources

A)

```

1 MATLEKIMKA FESLKSFOQQ QQQQQQQQQQ QQQQQQQQPP PPPPPPPPPQ LPQPPPAQAP LLPQPQPPPP PPPPPPGPAV AEPFLHRPKK ELSATKKDRV
101 NHCLTICENI VAQSVRNSPE FQKLLGTAME LFLLCSDDAE SDVRMVADEC LNKVIKALMD SNLPRLQLEL YKRIKKNAP RSLRAALWRF AELAHVLRPQ
201 KCRPYLVNLI PCLTRTSKRP EESVQETLAA AVPKIMASFG NFANDNEIKV LKKAFIANLK SSSPTIRRTA AGSAVSIQCH SRRTOYFYFVW LNLVLLGLLV
301 PVDEHSTLL ILGVLTLRLY LVPLLQQQVQK DTSLKGSFGV TRKEMEVSFS AEQLVQVYEL THTHTQDQH NVVTGALELL QQLFRTPPPE LLQTLTAVGG
401 IGQLTAAKEE SGGRSRSGSI VELIAGGSS CSPVLSRKQK GKVLLGEEEA LEDDESERSD VSSSALTASV KDEISGELAA SSGVSTPGSA GHDIITEQPR
501 SQHTLQADSV DLASCDLTS AADGDEEDIL SHSSSQVSAV PSDPAMDLDN GTQASSPISD SSQTTTEGPD SAVTPSDSSE IVLDGTDNQY LGLTIGQPQD
601 EDFEATGILP DEASEAFRNS SMALQQAHL KNSMHRQPS DSSVDKFLVR DEATEPGDQE NKPCRIRKGI QGSTDSDSAP LVHCVRLLSA SFLLTGGKNV
701 LVPDRDVRVS VKALALSCVG AVALHPESF FSKLYKVPDL TTEYPPEQYV SDILNYIDHG DPQVRGATAI LCGTILCSIL SRSRPHVGDW MGTIRTLTGN
801 TFLADDCIPL LRKTLKDESS VTCKLACTAV RNCVMSLCS SYSELGLQLI IDVLTNRSS YWLVRTLELE TLAIEDFRLV SFLEAKAENL HRGAHHYTGIL
901 LKIQERVLNN VVHLLGDED PRVRHVAAS LIRVVKPLFY KDCQQADPV VAVARDQSSV YLKLIMHETQ PPSHFSVSTI TRIYRGNLL PSITDVTMEN
1001 NLSRVIAAVS HELITSTTRA LTFGCEALC LLSTAFPVCI WSLGWHCGVP PLSASDESRC SCTVGMATMI LTLSSAWFP LDLSAQDAL ILAGNLLAAS
1101 APKSLRSSWA SEEEANPAAT QEEVWPALG DRALVPMVEQ LFSHLLKVIN ICAHVLDVA PGPAKKAALP SLTNPPSLSP IRRKGEKEPE GEQASVPLSP
1201 KKGSEASAS RQSDTSGPVT TSKSSSLGSP YHLPYSYKHL DVLKATHANY KVTLDLQNST EKFGGFLRSA LDVLSQILEL ATLQDIGKCV EELGLYKSC
1301 FSRPMMATV CVQQLLTKLF GTNLASQFDG LSSNPSKSG RAQLGSSSV RPLGYHYCFM APYTHFTQAL ADASLRNMVQ AQENDTSGW FDLVQKYSTQ
1401 LKTNLTSVTK NRADKNATHN HIRLFEPLVI KALKQYTTTT CVQLQKQVLD LLAQLVQLRV NYCLLSDQV FIGFVLKQFE YIEVQGFRES EATIPNIFPF
1501 LVLLSYERYH SKQTIIGPKI IQLCDGIMAS GRKAVTHAIP ALQPIVHDLF VLRGTNKADA GKELETQKEV VSMMLRLIQ YHQVLEMFIL VLQQCHKPNE
1601 DKWKRLSRQI ADIILPMLAK QMHSDSHEA LGVNLTFEI LAPSSLRPVD MLLRSMFVTP NTMASVSTVQ LWSGILAIL RVLISQSTED IVLSRIQELS
1701 FSPYLISCTV INRLRDGDS STLEHSEGG QIKNLPETTF SRFLQLVGI LLEDIVTKQL KVEMSEQHT FYCQELGTL MCLIHFKSG MFRRTATAAT
1801 RLFRSDGCGG SFYTLSDNLN RAPSMITTHP ALVLLWCQIL LVNHTDYRW WAEVQQTPKR HSLSTKLLS PQMSGEEDS DLAAKLGMCN REIVRRGALI
1901 LFCDYVCQNL HDSEHLTWLI VNIHQDLISL SHEPPVQDFI SAVHRNSAAS GLFIQAIQSR CENLSTPTML KTLQCLEGI HLSQSGAVLT LYVDRLLCTE
2001 FRVLARMVDI LACRNVEMLL AANLQSSMAQ LPMRELNRIQ EYLQSSGLAQ RHQRLYSLLD RFRSLTMQDS LSPSPVSSH PLDGDGHVSL ETVSPDKDNY
2101 VHLVKSQCWT RSDSALLEGA ELVNRIPAED MNAFMNNEF NLSLLAPCLS LGMSEISGGQ KSALFEAARE VTLARVSGTV QQLPAVHHVF QPELPAEPAA
2201 YWSKLNDLFG DAALYQSILPT LARALAQYLV VSKLPSHLH LPPEKEKDIY KVVVATLEAL SWHLTHEQIP LSLDLQAGLD CCLALQLPQ LWSVVSSTEF
2301 VTHACSLIYC VHFILEAVAV QPGEQLLSP RRTNTPKAIS EEEVEVDPT QNPKYITAA EMVAEMVESL QSVIALGHKR NSGVPAFLTP LLRNIITSLA
2401 RLPLVNSYTR VPLVWKLGV SPKPGGDFGT AFPEIPEVEFL QKEVFKEFI YRINTLQWTS RTQFEETWAT LGLVLTQPL VMEQESPEP EDTERTQNV
2501 LAVQAITSLV LSAMTVPVAG NPAVSCLEQQ PRNKPLKALD TRFGRKLSII RGIVEQEIQA MVSKRENAT HHLYQAWDPV PSLSPATGGA LISHEKLLQ
2601 INPERELGSM SYKLQVSIH SVMLGNSITP LREEENDEEE EEEADAPAPS SPPTSPVNSR KHRAGVDIHS CSQFLLELYS RWLPSSSAR RTPALLISEV
2701 VRSLLVSDI FTERNQPELM VYTLTELRV HPSEDEILAQ YLVPATCKAA AVLGMDKAVA EPVSRLEST LRSSHLPSPV GALHGVLYVL ECDLDDTAK
2801 QLIPVISDYL LSNLGIATHC VNIHQDQHVLCMCATFYLI ENYPLDVGPE FSASITQMG VMLSGSEEST PSIIYHCAIR GLERLLLESEQLSRDLAESLV
2901 KLSVDRVNVH SPHRAMAALG LMLTQMYTGK EKVSQRTSD PNPAAPDSES VIVAMERVSV LFDRIKGFPP CEARVVARIL PQFLDDFFPP QDIMNKVIGE
3001 FLSNQQPPYQ FMATVYKVF QTLHSTGQSS MVRDWMVLSL SNFTQRPVPA MATWSLSCFF VSASTSPWVA ALLPHVISRW GKLEQVDVNL FCLVATDFYR
3101 HQTEEELDRR AFQSVLEVVA APGSPYHRL TCLRNVHKVT TC

```

B)

```

1 MATLEKIMKA FESLKSFOQQ QQQQQQQQQQ QQQQQQQQPP PPPPPPPPPQ LPQPPPAQAP LLPQPQPPPP PPPPPPGPAV AEPFLHRPKK ELSATKKDRV
101 NHCLTICENI VAQSVRNSPE FQKLLGTAME LFLLCSDDAE SDVRMVADEC LNKVIKALMD SNLPRLQLEL YKRIKKNAP RSLRAALWRF AELAHVLRPQ
201 KCRPYLVNLI PCLTRTSKRP EESVQETLAA AVPKIMASFG NFANDNEIKV LKKAFIANLK SSSPTIRRTA AGSAVSIQCH SRRTOYFYFVW LNLVLLGLLV
301 PVDEHSTLL ILGVLTLRLY LVPLLQQQVQK DTSLKGSFGV TRKEMEVSFS AEQLVQVYEL THTHTQDQH NVVTGALELL QQLFRTPPPE LLQTLTAVGG
401 IGQLTAAKEE SGGRSRSGSI VELIAGGSS CSPVLSRKQK GKVLLGEEEA LEDDESERSD VSSSALTASV KDEISGELAA SSGVSTPGSA GHDIITEQPR
501 SQHTLQADSV DLASCDLTS AADGDEEDIL SHSSSQVSAV PSDPAMDLDN GTQASSPISD SSQTTTEGPD SAVTPSDSSE IVLDGTDNQY LGLTIGQPQD
601 EDFEATGILP DEASEAFRNS SMALQQAHL KNSMHRQPS DSSVDKFLVR DEATEPGDQE NKPCRIRKGI QGSTDSDSAP LVHCVRLLSA SFLLTGGKNV
701 LVPDRDVRVS VKALALSCVG AVALHPESF FSKLYKVPDL TTEYPPEQYV SDILNYIDHG DPQVRGATAI LCGTILCSIL SRSRPHVGDW MGTIRTLTGN
801 TFLADDCIPL LRKTLKDESS VTCKLACTAV RNCVMSLCS SYSELGLQLI IDVLTNRSS YWLVRTLELE TLAIEDFRLV SFLEAKAENL HRGAHHYTGIL
901 LKIQERVLNN VVHLLGDED PRVRHVAAS LIRVVKPLFY KDCQQADPV VAVARDQSSV YLKLIMHETQ PPSHFSVSTI TRIYRGNLL PSITDVTMEN
1001 NLSRVIAAVS HELITSTTRA LTFGCEALC LLSTAFPVCI WSLGWHCGVP PLSASDESRC SCTVGMATMI LTLSSAWFP LDLSAQDAL ILAGNLLAAS
1101 APKSLRSSWA SEEEANPAAT QEEVWPALG DRALVPMVEQ LFSHLLKVIN ICAHVLDVA PGPAKKAALP SLTNPPSLSP IRRKGEKEPE GEQASVPLSP
1201 KKGSEASAS RQSDTSGPVT TSKSSSLGSP YHLPYSYKHL DVLKATHANY KVTLDLQNST EKFGGFLRSA LDVLSQILEL ATLQDIGKCV EELGLYKSC
1301 FSRPMMATV CVQQLLTKLF GTNLASQFDG LSSNPSKSG RAQLGSSSV RPLGYHYCFM APYTHFTQAL ADASLRNMVQ AQENDTSGW FDLVQKYSTQ
1401 LKTNLTSVTK NRADKNATHN HIRLFEPLVI KALKQYTTTT CVQLQKQVLD LLAQLVQLRV NYCLLSDQV FIGFVLKQFE YIEVQGFRES EATIPNIFPF
1501 LVLLSYERYH SKQTIIGPKI IQLCDGIMAS GRKAVTHAIP ALQPIVHDLF VLRGTNKADA GKELETQKEV VSMMLRLIQ YHQVLEMFIL VLQQCHKPNE
1601 DKWKRLSRQI ADIILPMLAK QMHSDSHEA LGVNLTFEI LAPSSLRPVD MLLRSMFVTP NTMASVSTVQ LWSGILAIL RVLISQSTED IVLSRIQELS
1701 FSPYLISCTV INRLRDGDS STLEHSEGG QIKNLPETTF SRFLQLVGI LLEDIVTKQL KVEMSEQHT FYCQELGTL MCLIHFKSG MFRRTATAAT
1801 RLFRSDGCGG SFYTLSDNLN RAPSMITTHP ALVLLWCQIL LVNHTDYRW WAEVQQTPKR HSLSTKLLS PQMSGEEDS DLAAKLGMCN REIVRRGALI
1901 LFCDYVCQNL HDSEHLTWLI VNIHQDLISL SHEPPVQDFI SAVHRNSAAS GLFIQAIQSR CENLSTPTML KTLQCLEGI HLSQSGAVLT LYVDRLLCTE
2001 FRVLARMVDI LACRNVEMLL AANLQSSMAQ LPMRELNRIQ EYLQSSGLAQ RHQRLYSLLD RFRSLTMQDS LSPSPVSSH PLDGDGHVSL ETVSPDKDNY
2101 VHLVKSQCWT RSDSALLEGA ELVNRIPAED MNAFMNNEF NLSLLAPCLS LGMSEISGGQ KSALFEAARE VTLARVSGTV QQLPAVHHVF QPELPAEPAA
2201 YWSKLNDLFG DAALYQSILPT LARALAQYLV VSKLPSHLH LPPEKEKDIY KVVVATLEAL SWHLTHEQIP LSLDLQAGLD CCLALQLPQ LWSVVSSTEF
2301 VTHACSLIYC VHFILEAVAV QPGEQLLSP RRTNTPKAIS EEEVEVDPT QNPKYITAA EMVAEMVESL QSVIALGHKR NSGVPAFLTP LLRNIITSLA
2401 RLPLVNSYTR VPLVWKLGV SPKPGGDFGT AFPEIPEVEFL QKEVFKEFI YRINTLQWTS RTQFEETWAT LGLVLTQPL VMEQESPEP EDTERTQNV
2501 LAVQAITSLV LSAMTVPVAG NPAVSCLEQQ PRNKPLKALD TRFGRKLSII RGIVEQEIQA MVSKRENAT HHLYQAWDPV PSLSPATGGA LISHEKLLQ
2601 INPERELGSM SYKLQVSIH SVMLGNSITP LREEENDEEE EEEADAPAPS SPPTSPVNSR KHRAGVDIHS CSQFLLELYS RWLPSSSAR RTPALLISEV
2701 VRSLLVSDI FTERNQPELM VYTLTELRV HPSEDEILAQ YLVPATCKAA AVLGMDKAVA EPVSRLEST LRSSHLPSPV GALHGVLYVL ECDLDDTAK
2801 QLIPVISDYL LSNLGIATHC VNIHQDQHVLCMCATFYLI ENYPLDVGPE FSASITQMG VMLSGSEEST PSIIYHCAIR GLERLLLESEQLSRDLAESLV
2901 KLSVDRVNVH SPHRAMAALG LMLTQMYTGK EKVSQRTSD PNPAAPDSES VIVAMERVSV LFDRIKGFPP CEARVVARIL PQFLDDFFPP QDIMNKVIGE
3001 FLSNQQPPYQ FMATVYKVF QTLHSTGQSS MVRDWMVLSL SNFTQRPVPA MATWSLSCFF VSASTSPWVA ALLPHVISRW GKLEQVDVNL FCLVATDFYR
3101 HQTEEELDRR AFQSVLEVVA APGSPYHRL TCLRNVHKVT TC

```

Figure S3. Primary sequence coverage maps of EXPI293F HTT<sup>1-3144</sup> Q23 digested with trypsin. A) 77% coverage obtained from solution, and B) 62% coverage from a gel band. NB: table displays HTT Q21 sequence as UniProt database used in sequence search.

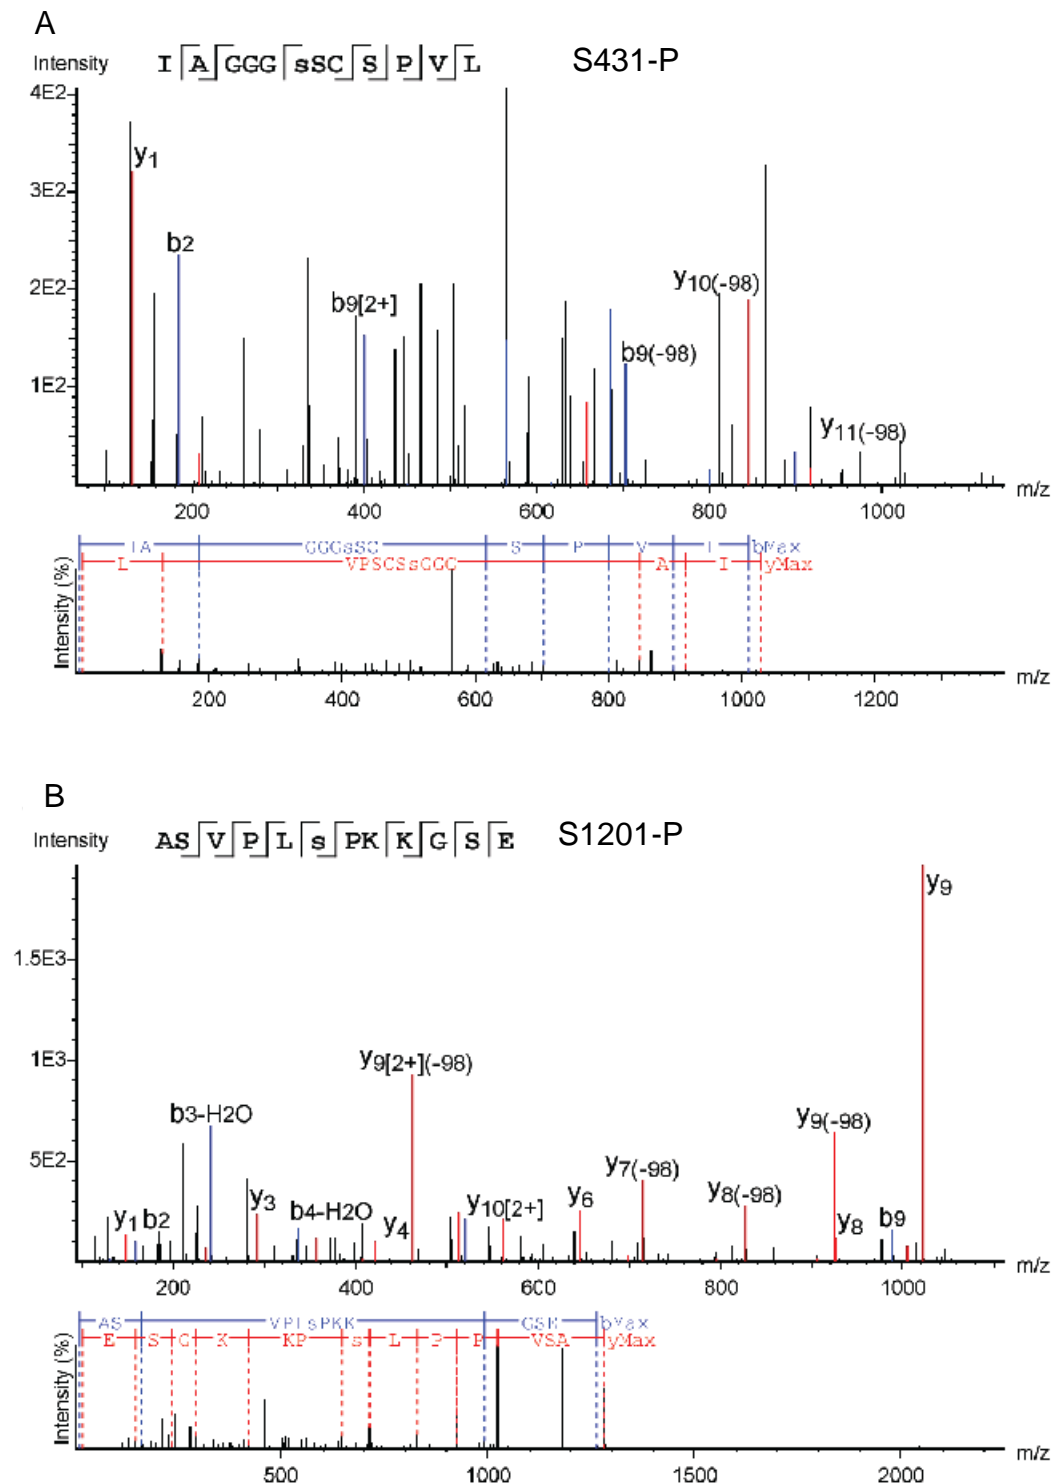

**Figure S4. Exemplary spectra of pepsin digested HTT<sup>1-3144</sup> Q23 from Sf9.** Full data can be found through PRIDE (2) with accession PXD010865.

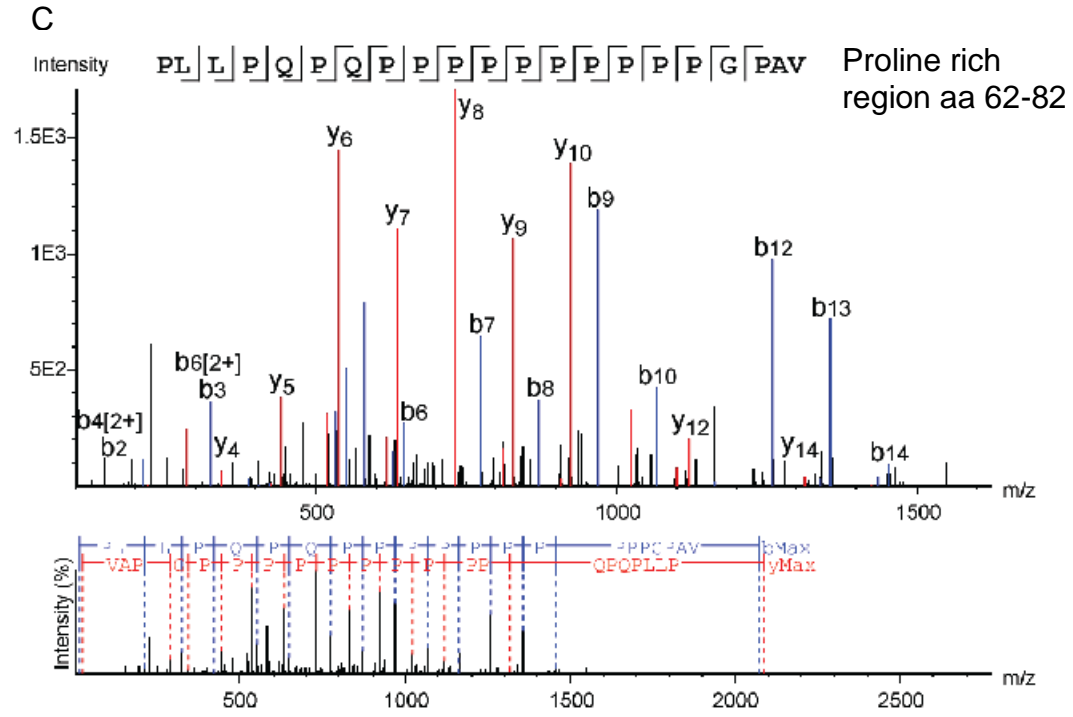

Figure S4 continued.

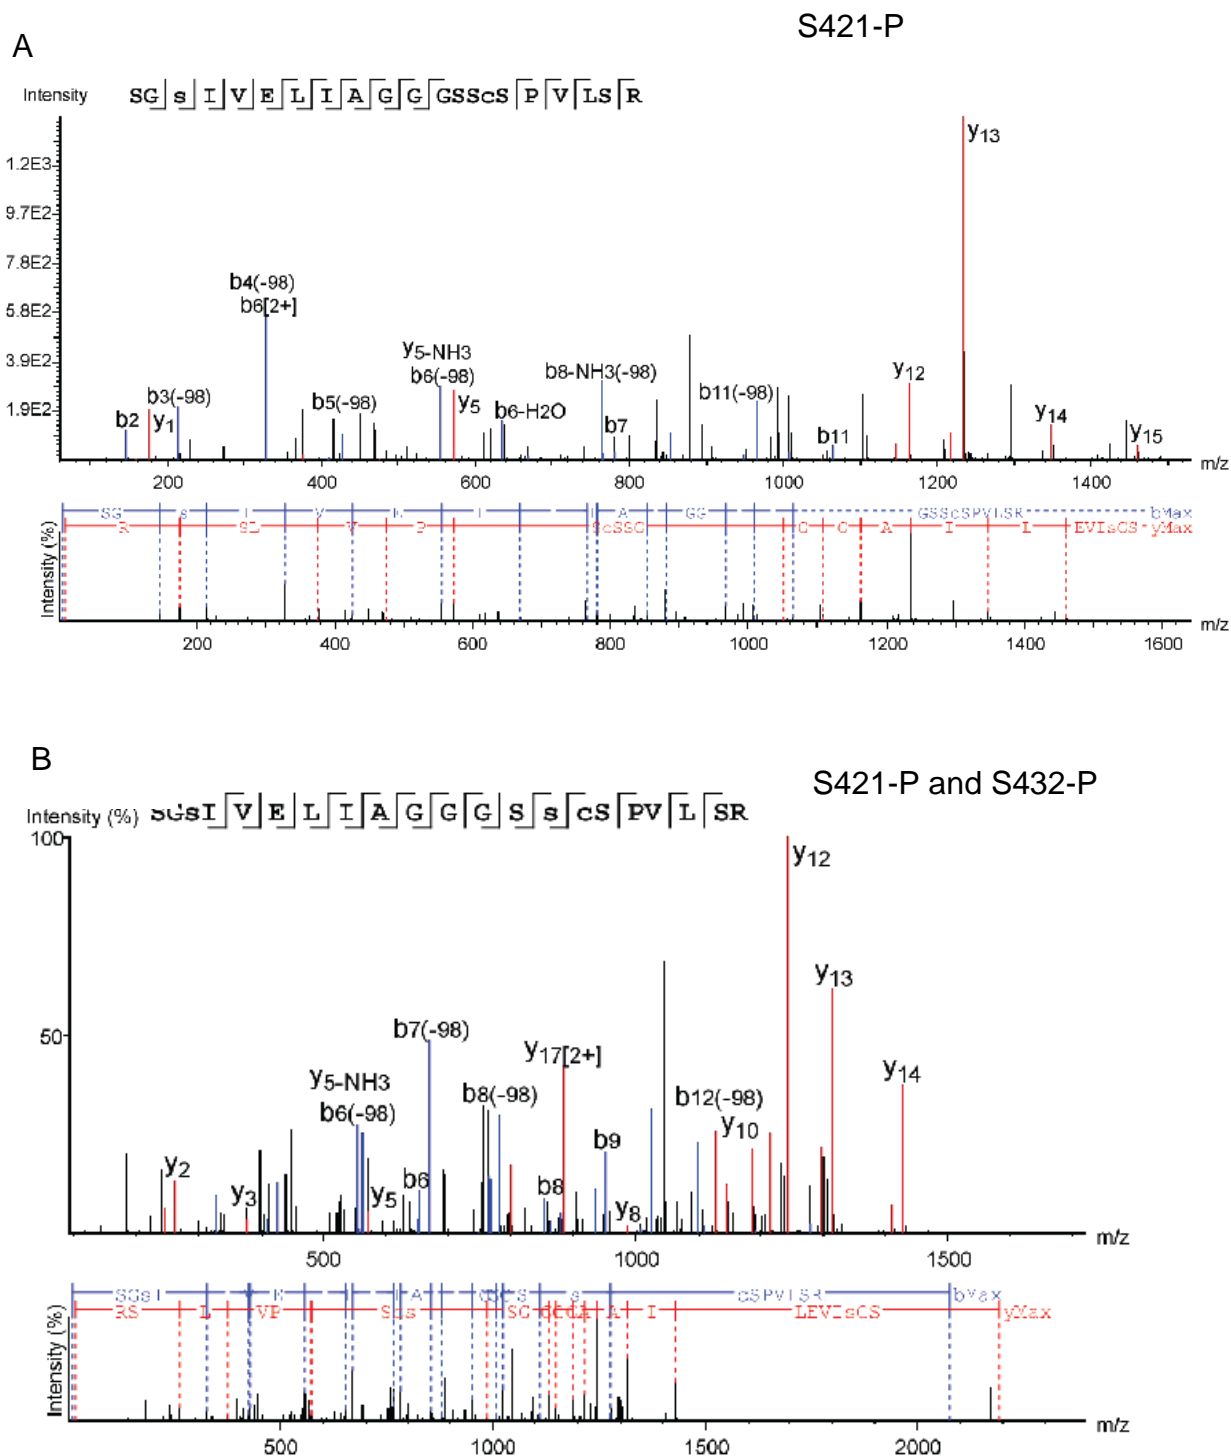

**Figure S5. Exemplary spectra of trypsin or lysargiNase digested HTT<sup>1-3144</sup> Q23 from S19.** Full data can be found through PRIDE (2) with accession PXD010865.



C

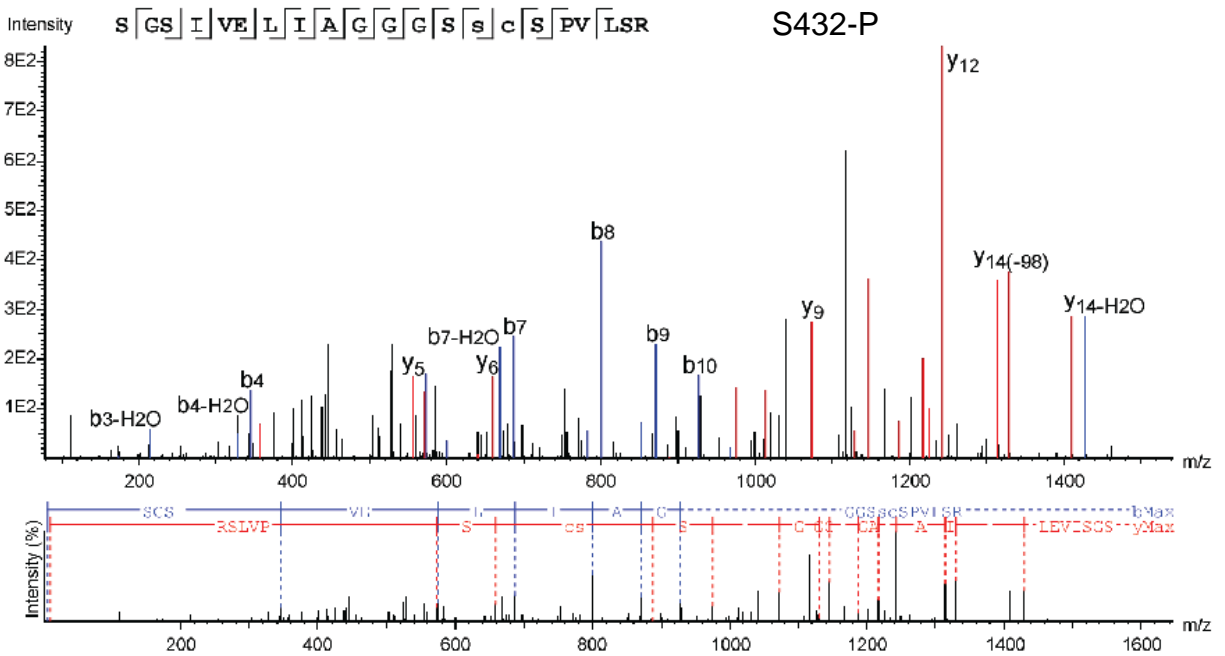

D

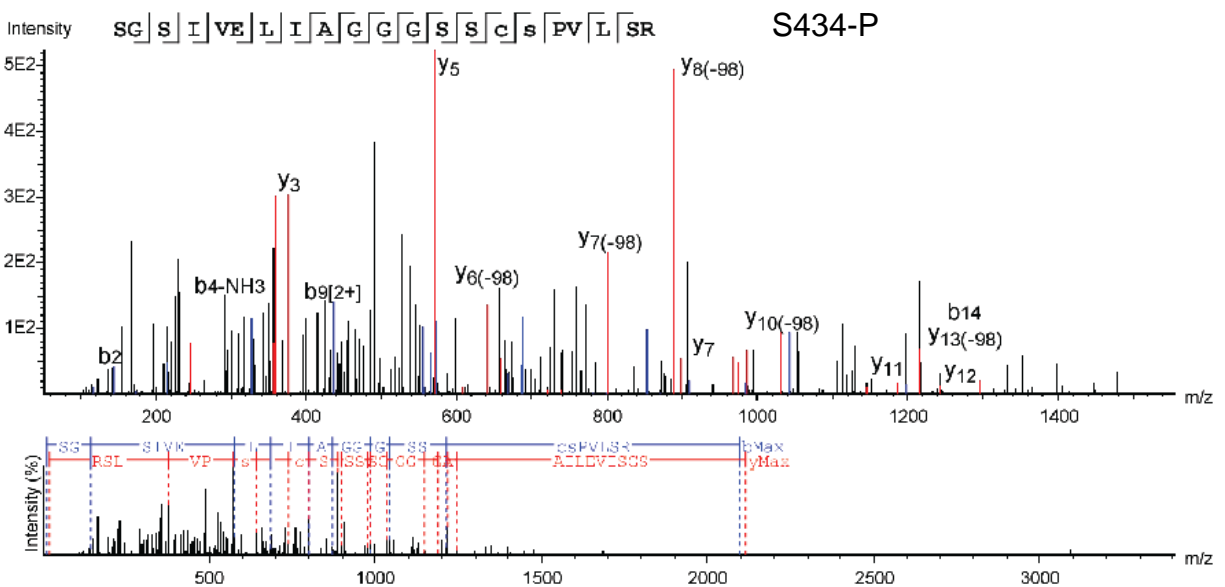

Figure S5 continued.

**E**

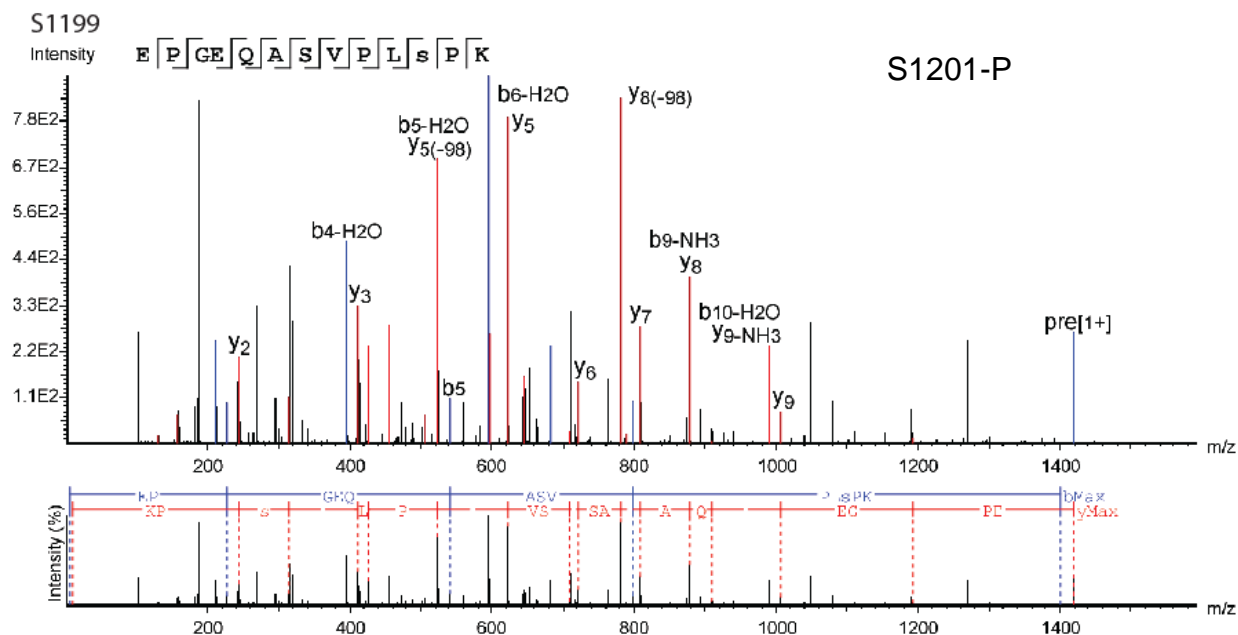

**F**

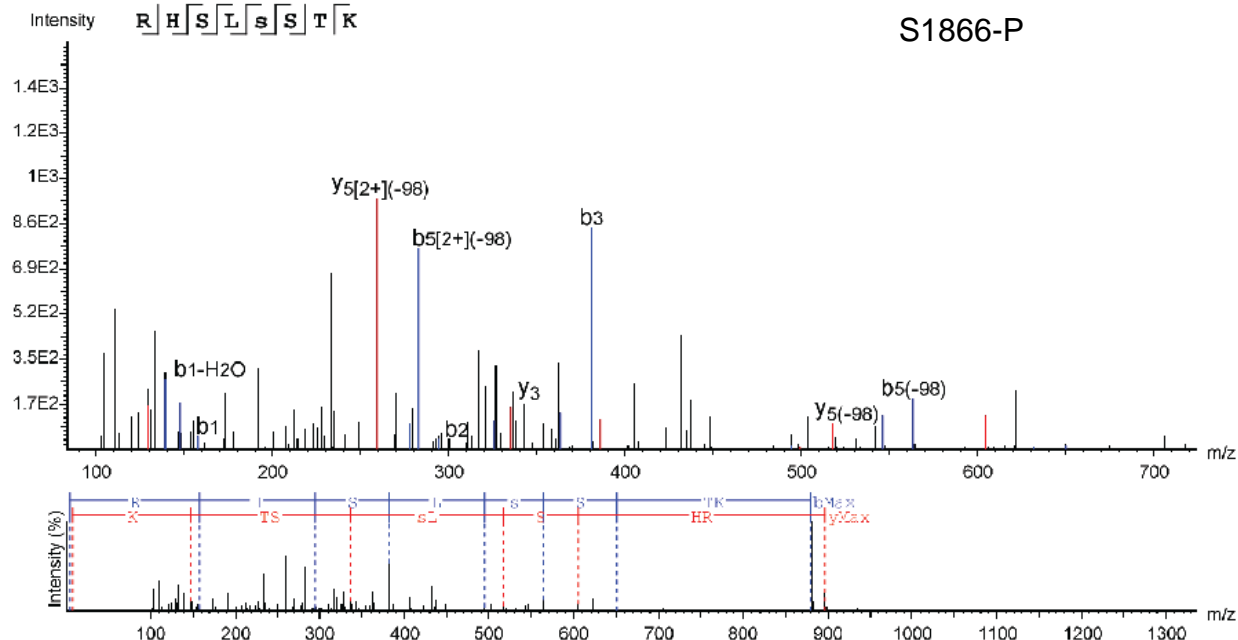

Figure S5 continued.

G

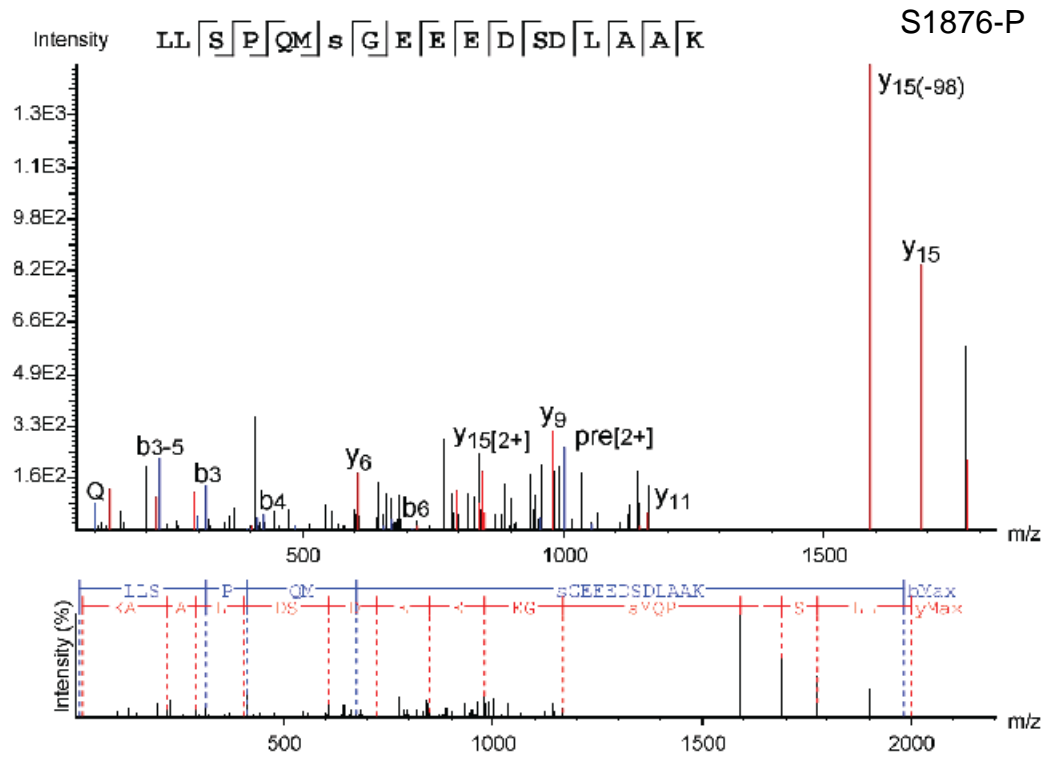

H

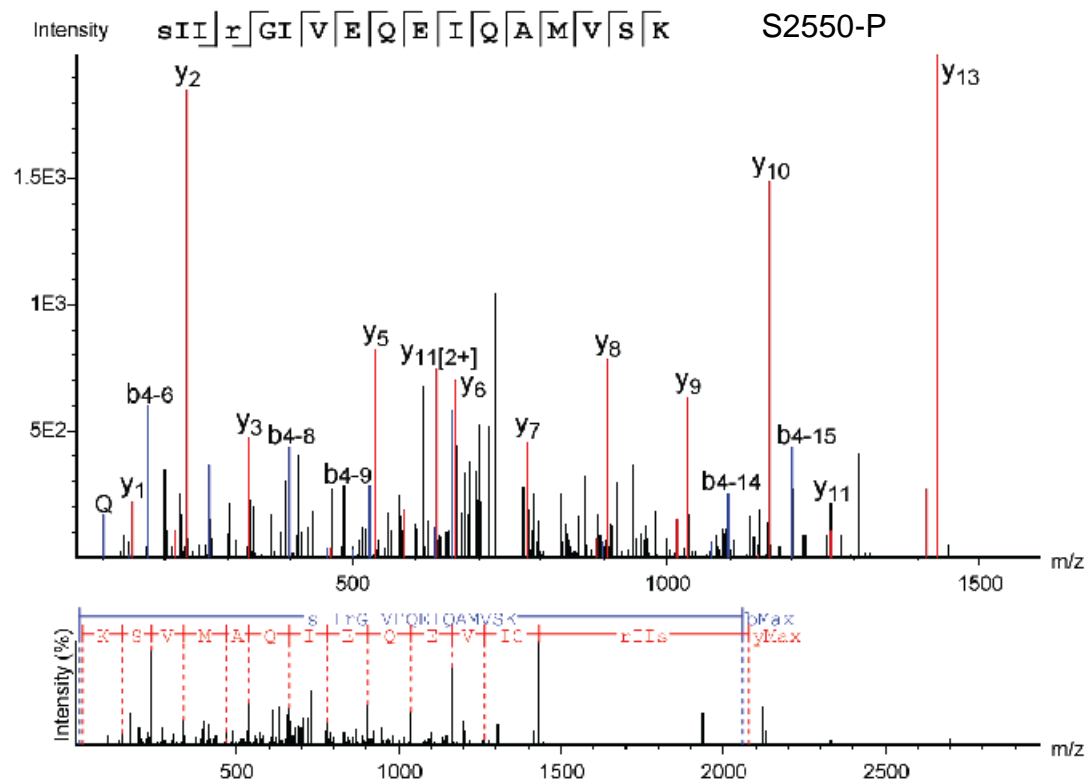

Figure S5 continued.

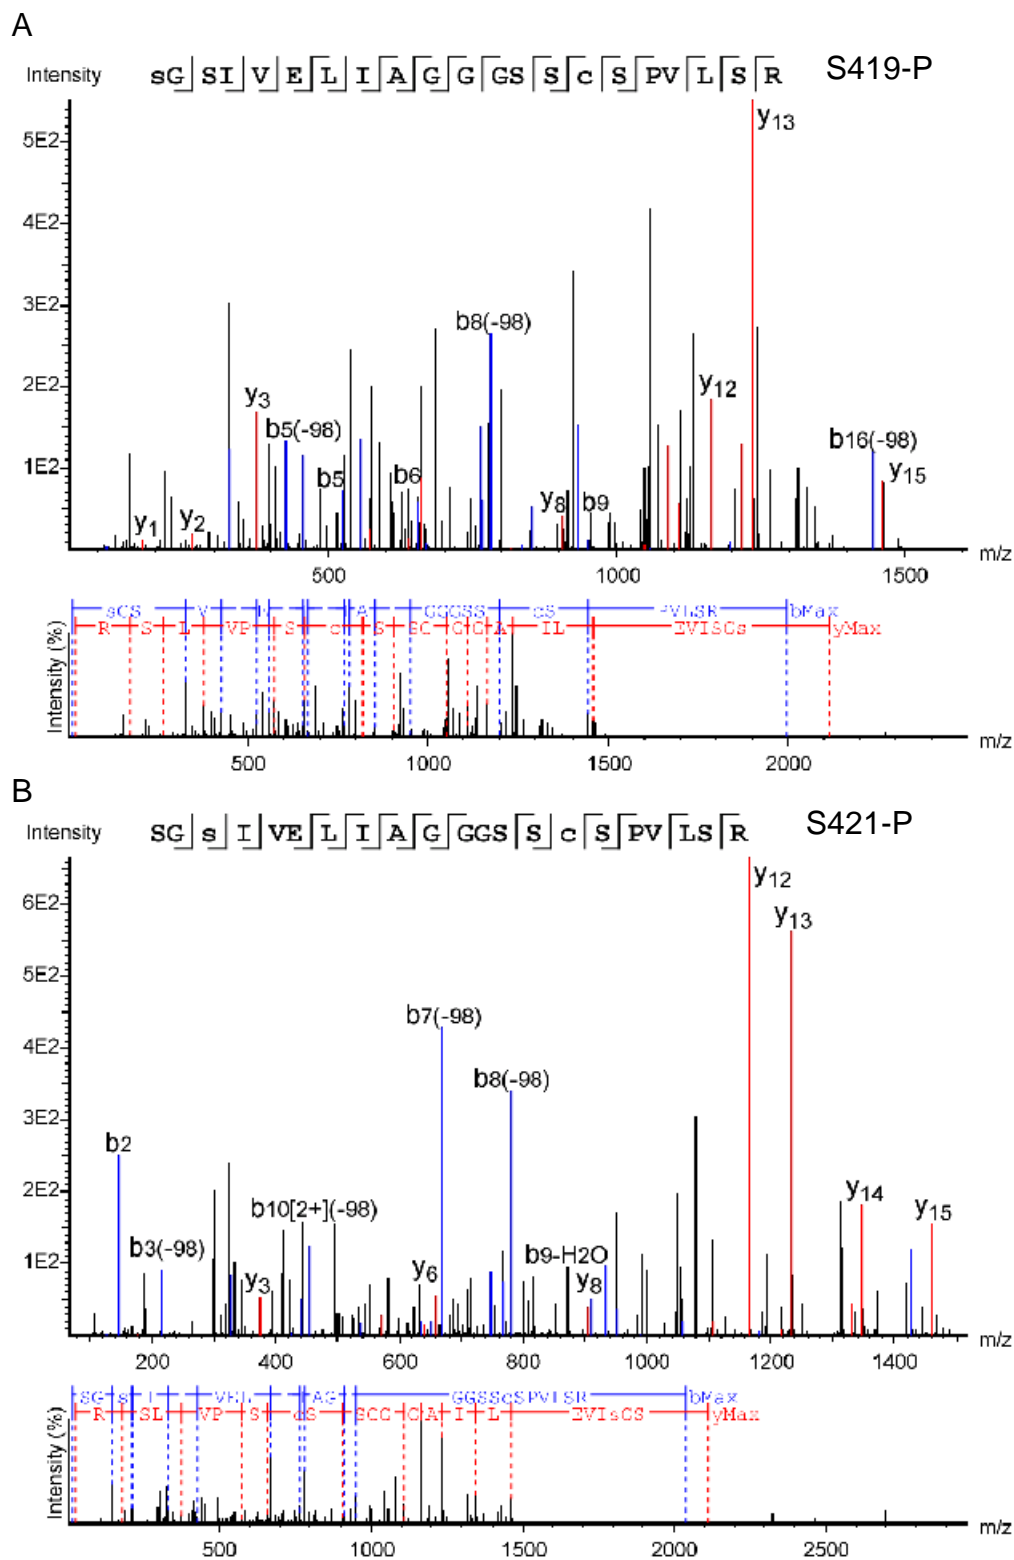

**Figure S6. Exemplary spectra of trypsin digested HTT<sup>1-3144</sup> Q23 from EXPI293F.**

Full data can be found through PRIDE (2) with accession PXD010865.

C

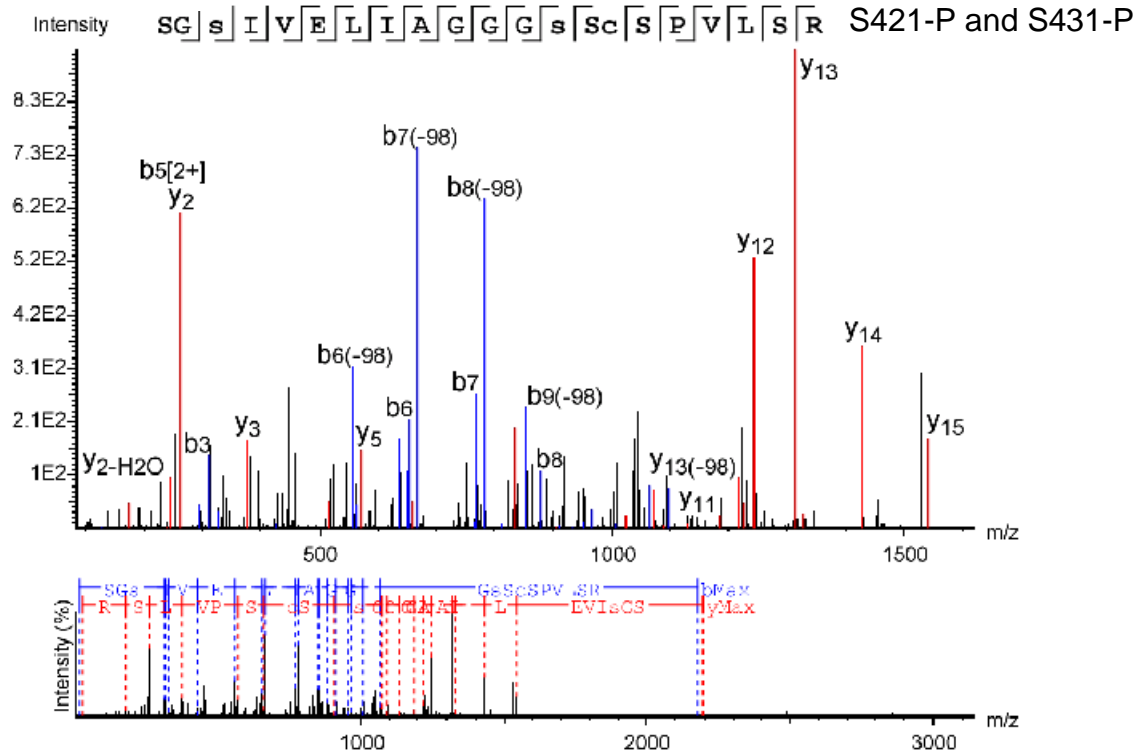

D

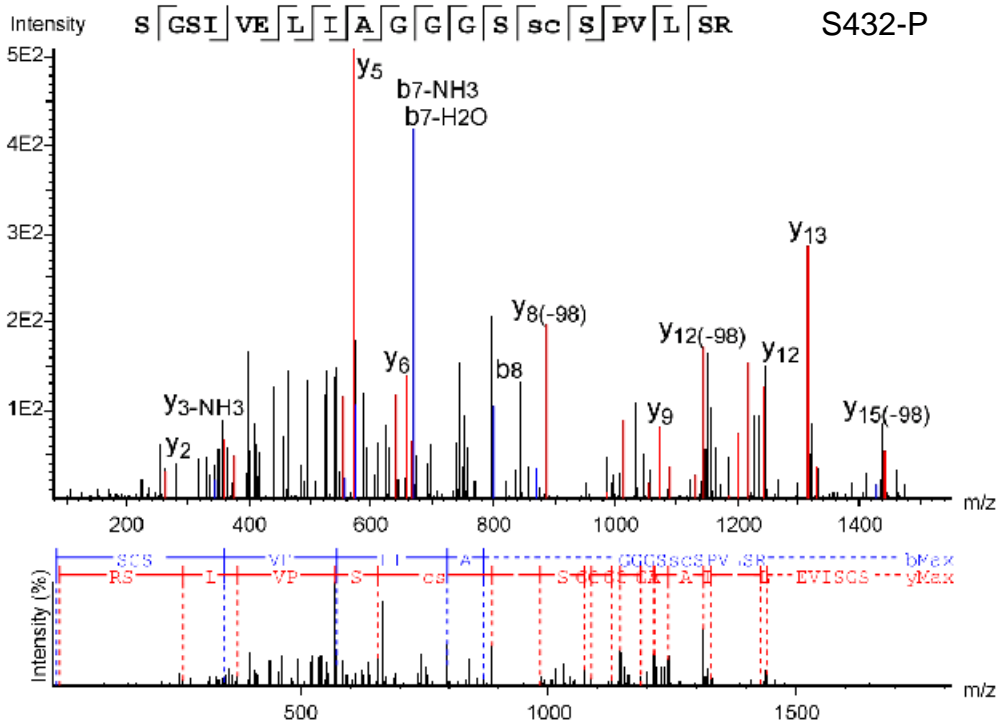

Figure S6 continued.

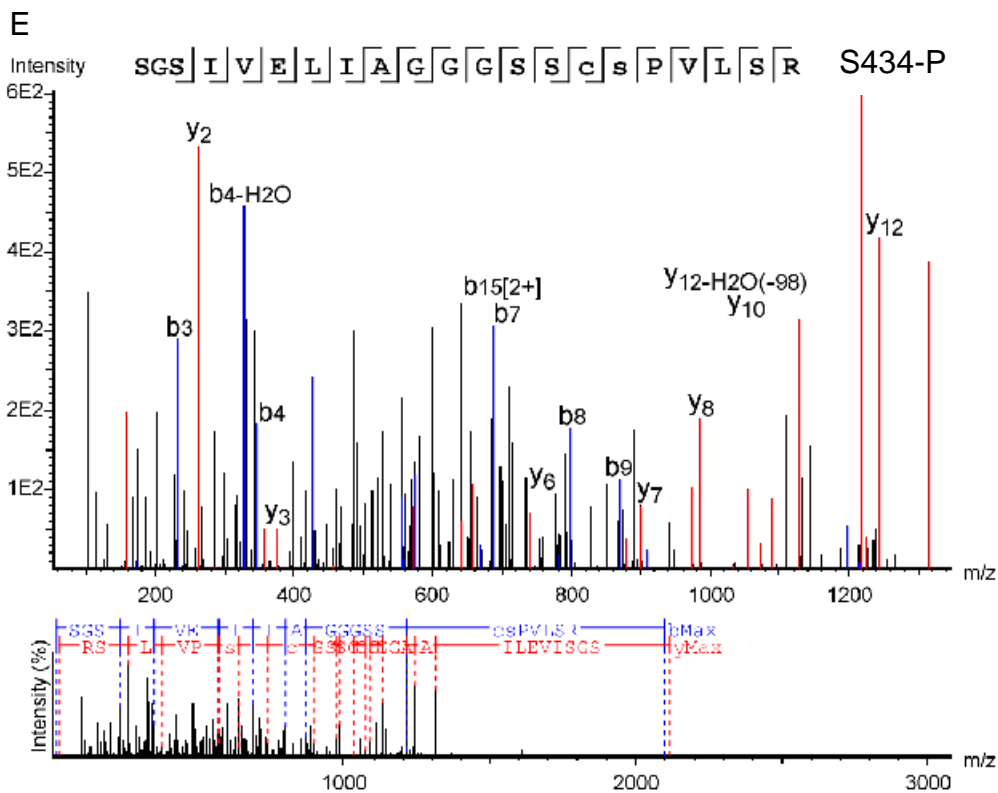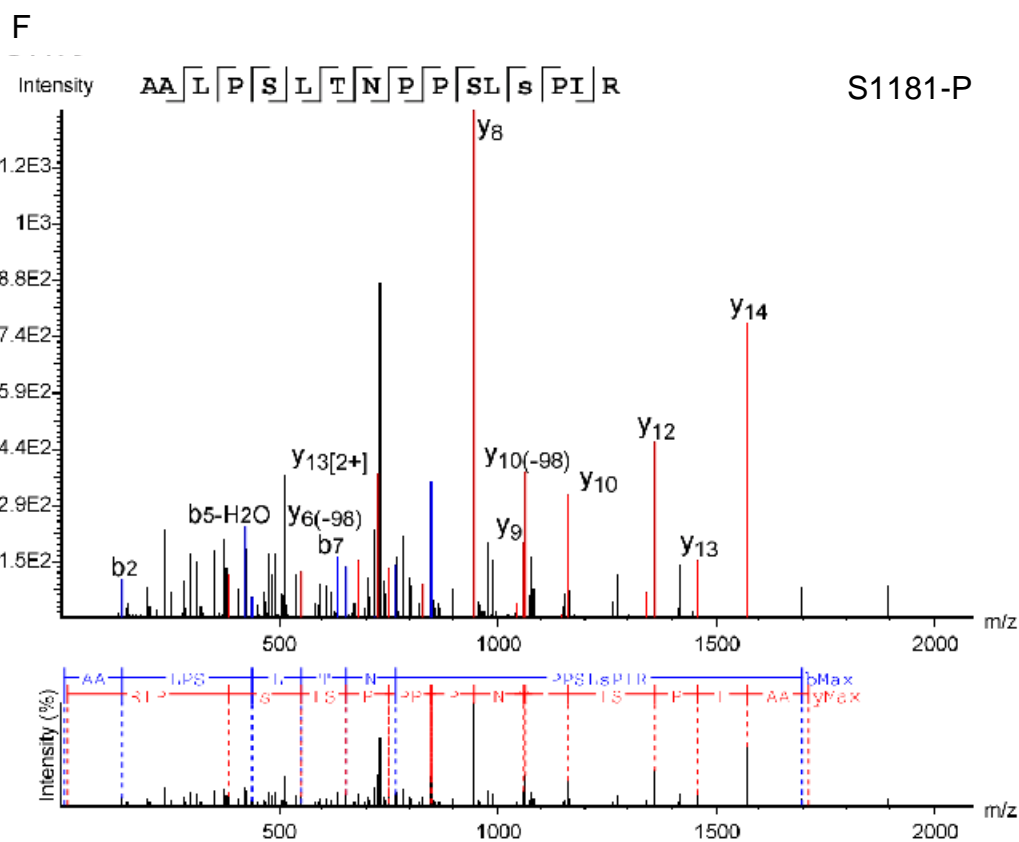

Figure S6 continued.



G

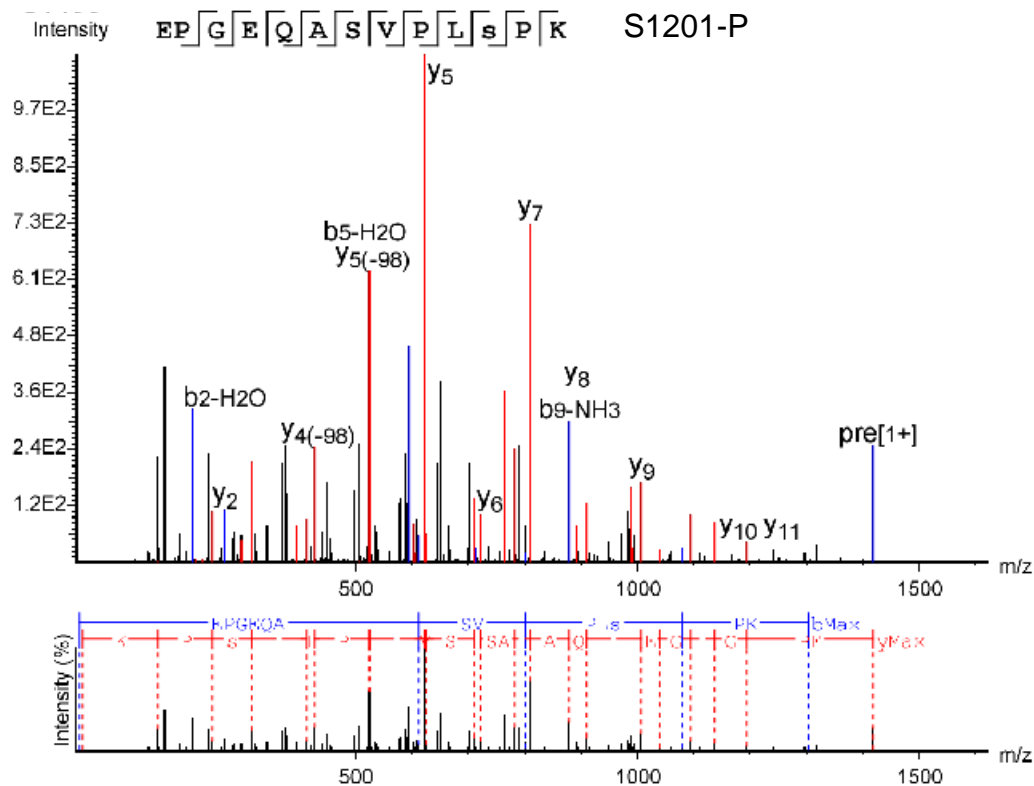

H

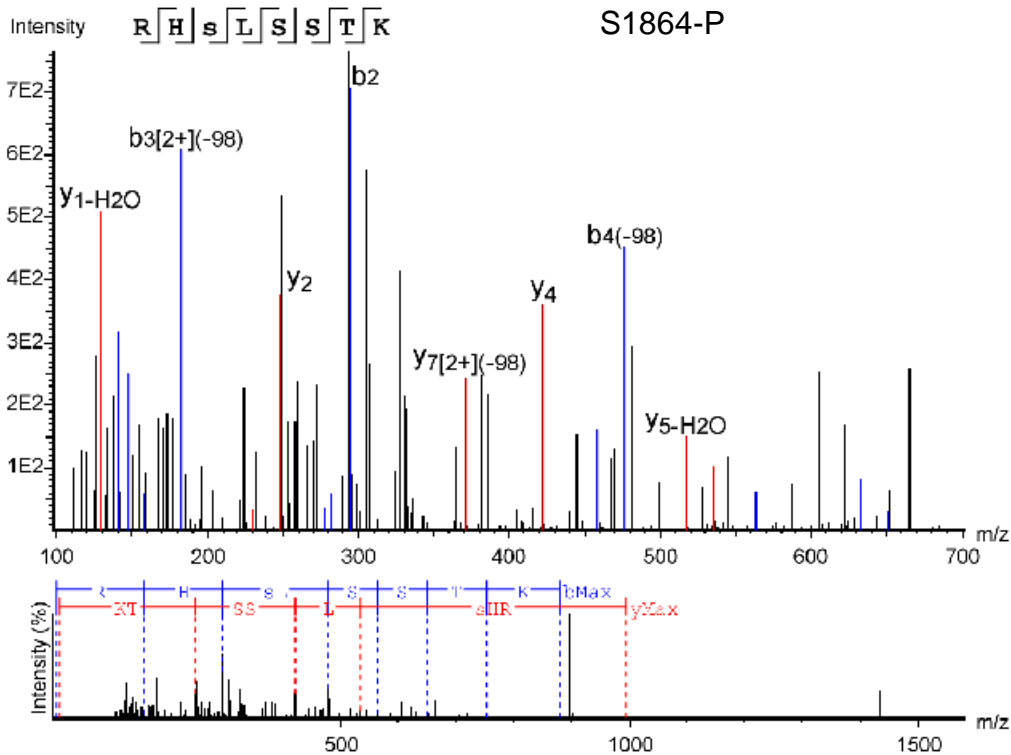

Figure S6 continued.

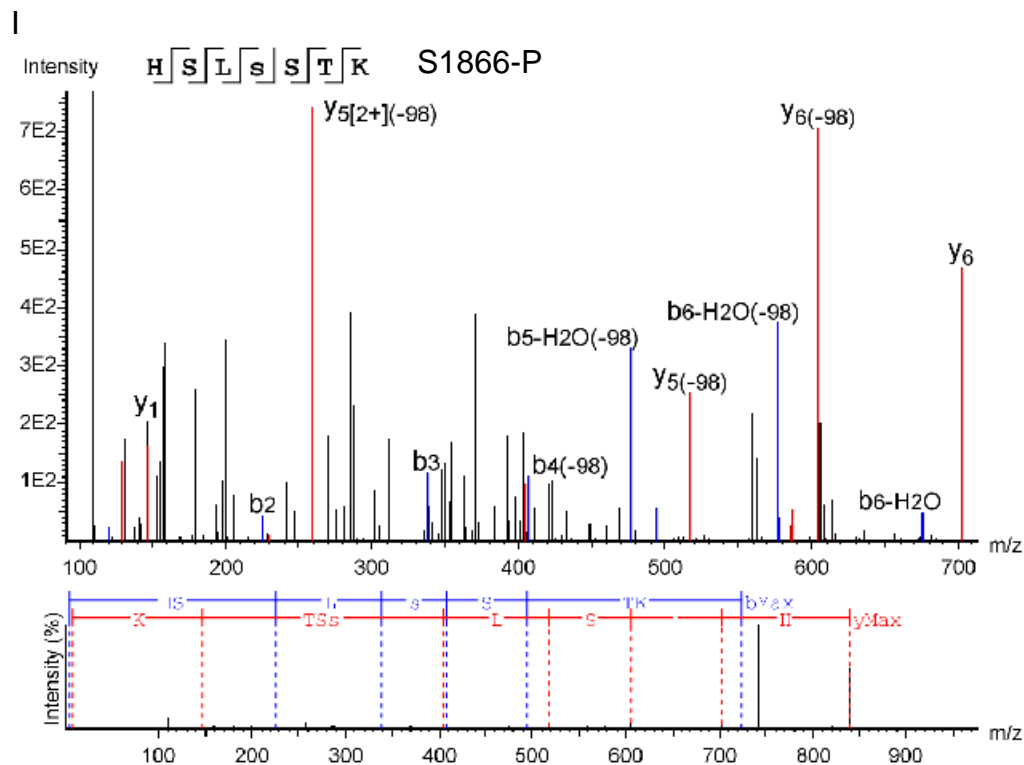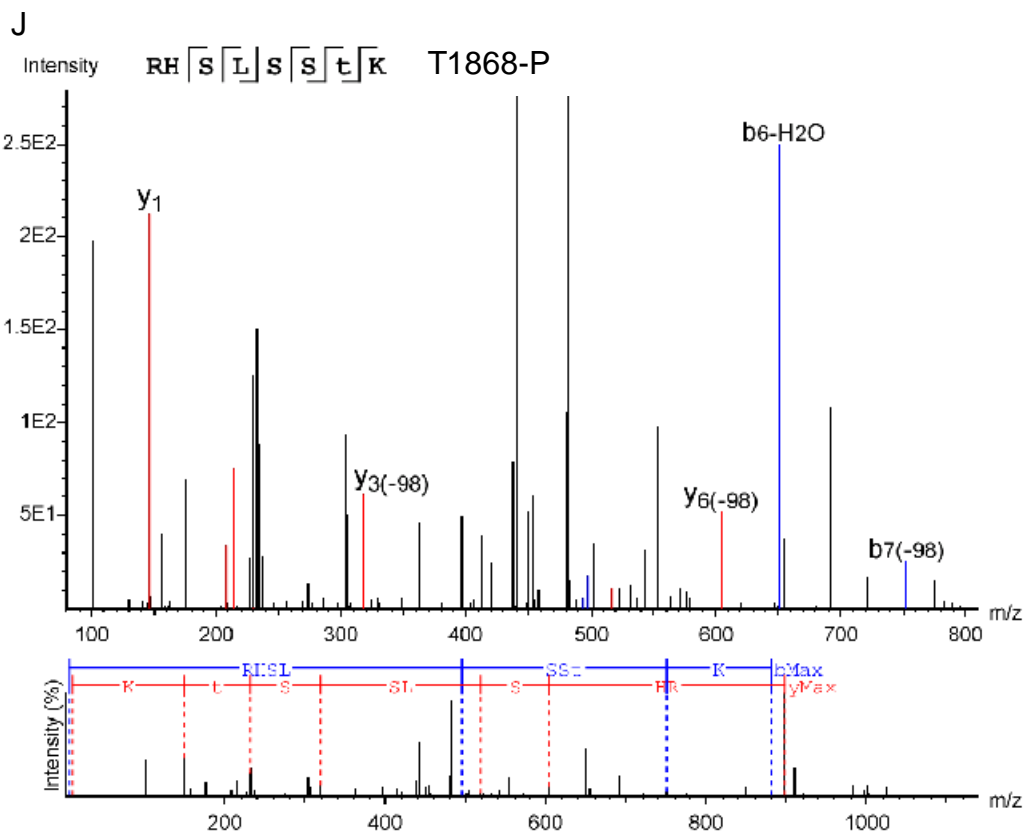

Figure S6 continued.

K

Intensity **SSH** **L** **PSrVGALHGVL** **Y** **V** **L** **E** **c** **D** **L** **L** **D** **D** **TA** **K** R2781me

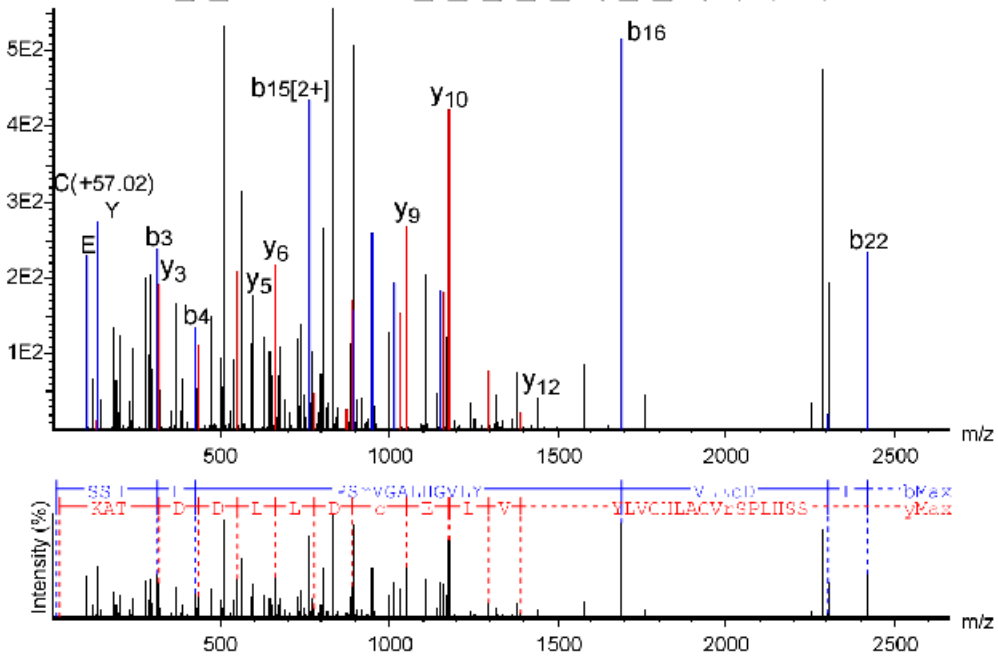

Figure S6 continued.

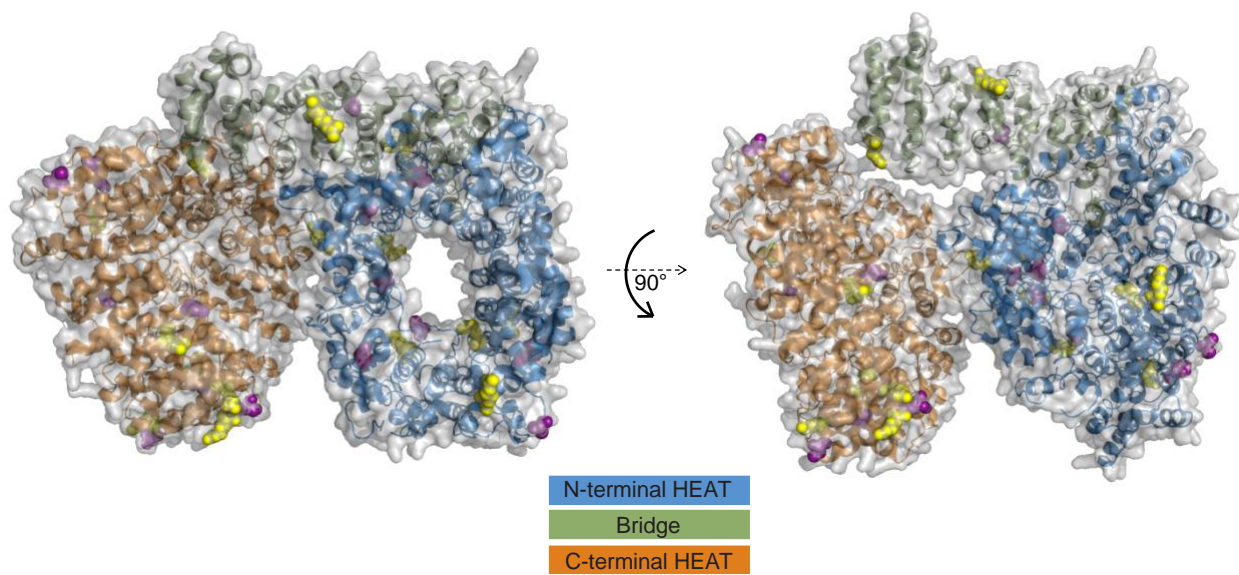

**Figure S7. Mapping HTT posttranslational modifications identified from HTT<sup>1-3144</sup> samples from Sf9 and EXPI293F cells onto the HTT structure.**

HTT is viewed top-down looking through the void in the N-terminal HEAT domain on the right hand side. Phosphorylation sites are shown in pink and all other modification sites are shown in green. As these samples were expressed in the absence of the stabilising HAP40 protein, it is likely that the more conformationally flexible apo HTT protein molecule would have greater exposure of different domain surfaces that would permit more sites to be modified than might be estimated from assessing the HTT-HAP40 molecule.

## REFERENCES

1. Mellacheruvu, D., Wright, Z., Couzens, A. L., Lambert, J.-P., St-Denis, N., Li, T., Miteva, Y. V., Hauri, S., Sardi, M. E., Low, T. Y., Halim, V. A., Bagshaw, R. D., Hubner, N. C., al-Hakim, A., Bouchard, A., Faubert, D., Fermin, D., Dunham, W. H., Goudreault, M., Lin, Z.-Y., Badillo, B. G., Pawson, T., Durocher, D., Coulombe, B., Aebersold, R., Superti-Furga, G., Colinge, J., Heck, A. J. R., Choi, H., Gstaiger, M., Mohammed, S., Cristea, I. M., Bennett, K. L., Washburn, M. P., Raught, B., Ewing, R. M., Gingras, A.-C., and Nesvizhskii, A. I. (2013) The CRAPome: a Contaminant Repository for Affinity Purification Mass Spectrometry Data. *Nat. Methods*. **10**, 730–736
2. Jones, P., Côté, R. G., Martens, L., Quinn, A. F., Taylor, C. F., Derache, W., Hermjakob, H., and Apweiler, R. (2006) PRIDE: a public repository of protein and peptide identifications for the proteomics community. *Nucleic Acids Res.* **34**, D659–D663
